# Supplementary material for: Magnetic percolation in CN-bridged ferrimagnetic coordination polymers
Source: Royal Society of Chemistry journal article supplement (doi:10.1039/c8dt01893f), 2018-01-01
Supplement: c8dt01893f1.pdf [file c8dt01893f1.pdf]

ELECTRONIC SUPPLEMENTARY INFORMATION

## Magnetic percolation in CN-bridged ferrimagnetic coordination polymers

Piotr Konieczny,<sup>a,\*</sup> Robert Pełka,<sup>a,\*</sup> Tadeusz Wasiutyński,<sup>a</sup> Marcin Oszajca,<sup>b</sup> Barbara Sieklucka,<sup>b</sup> Dawid Pinkowicz<sup>b,\*</sup>

### Details of the transition temperature determination in the $\text{Nb}_x\text{Mo}_{1-x}\text{Mn}_2$ series

The transition temperatures were determined as the position of the first local minimum (occurring at the higher temperature) of the first derivative of the real component  $\chi'$  of the  $ac$  susceptibility signal (please note that for  $x = 1$  and 0.83 a second minimum is present, which is the blocking temperature ( $T_B$ ) of the domain-wall mobility in ferri- and ferromagnets due to the Hopkinson effect). Due to the discretized nature of experimental points the position and height of the minimum depends on how one calculates the derivative value: it can be estimated as a left, right or central differential, incurring some level of uncertainty to a determined quantity. It was checked that for any value of  $x$  the scatter of the minimum amplitude did not exceed 6%. Therefore, the uncertainty of  $T_c$  was estimated as half width at the level of 94% of the peak height.

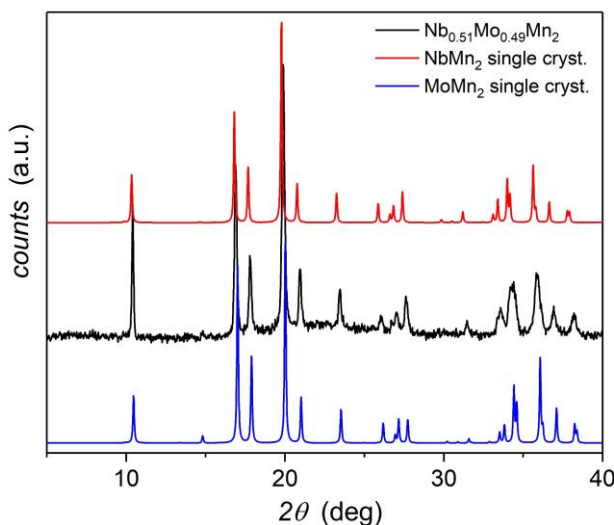

Figure S1. Experimental powder X-ray diffraction pattern for  $\text{Nb}_{0.51}\text{Mo}_{0.49}\text{Mn}_2$  and the simulated ones for  $\text{NbMn}_2$  and  $\text{MoMn}_2$  based on the literature single crystal XRD data.

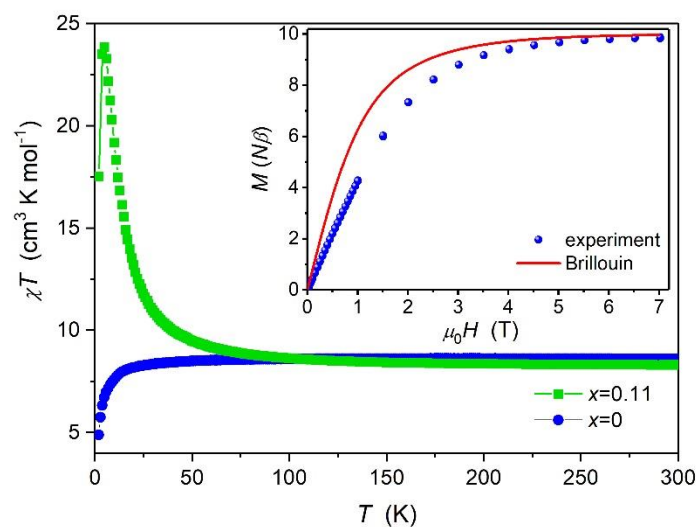

Figure S2. Temperature dependence of  $\chi T$  for  $\text{Nb}_x\text{Mo}_{1-x}\text{Mn}_2$  ( $x = 0$  and  $0.11$ ). Inset: Field dependence of isothermal magnetization of  $\text{MoMn}_2$  at  $2\text{ K}$  (symbols) compared to the purely paramagnetic signal (solid line) for  $x = 0$ .

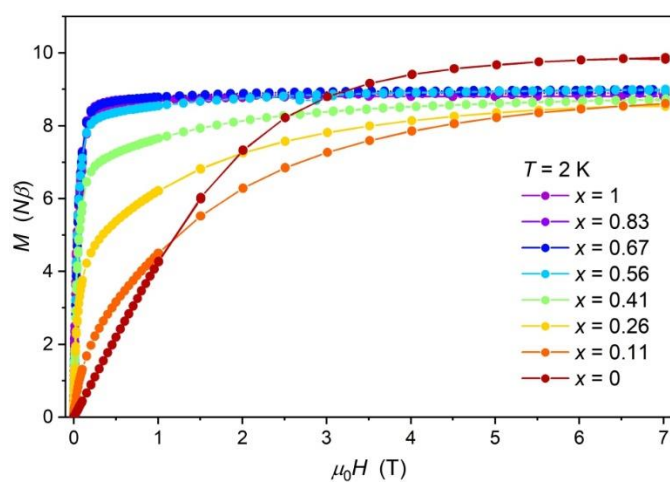

Figure S3. Magnetic field dependence of the molar magnetization for  $\text{Nb}_x\text{Mo}_{1-x}\text{Mn}_2$  recorded at  $2.0\text{ K}$ .

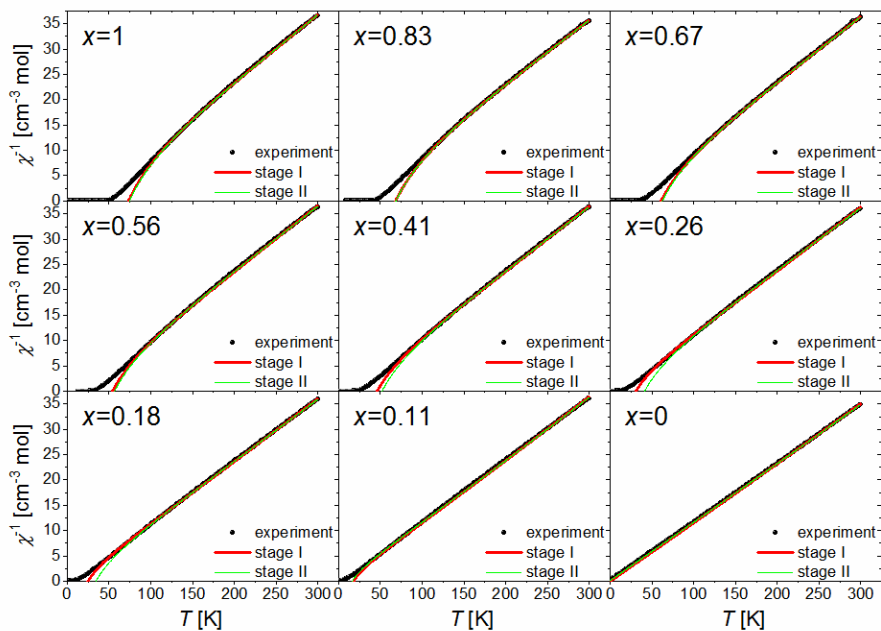

Figure S4.  $\chi^{-1}(T)$  dependences for  $\text{Nb}_x\text{Mo}_{1-x}\text{Mn}_2$  with the results of the I and II stage fitting. The fitting ranges are as follows: 100-300 K for  $x = 1$ , 118-300 K for  $x = 0.83$ , 114-300 K for  $x = 0.67$ , 93-300 K for  $x = 0.56$ , 119-300 K for  $x = 0.41$ , 104-300 K for  $x = 0.26$ , 99-300 K for  $x = 0.18$ , 21-300 K for  $x = 0.11$  and 21-300 K for  $x = 0$ .
